# Supplementary material for: The higher relative concentration of K + to Na + in saline water improves soil hydraulic conductivity, salt leaching efficiency and structural stability
Source: Copernicus journal article supplement (doi:10.5194/egusphere-2022-1390), 2023-03-03
Supplement: Supplementary file [file egusphere-2022-1390-AC2-supplement.pdf]

Dear reviewer:

Thank you for providing many constructive suggestions. Replacing NaCl in the pore water by K<sub>2</sub>SO<sub>4</sub> is really a good suggestion, because SO<sub>4</sub><sup>2-</sup> is less damaging to the soil structure compared to Cl<sup>-</sup>, so this might be a better way to assess the role of different cations.

Thanks again.
